# Supplementary material for: Brosimone I, an isoprenoid-substituted flavonoid, induces cell cycle G1phase arrest and apoptosis through ROS-dependent endoplasmic reticulum stress in HCT116 human colon cancer cells
Source: Royal Society of Chemistry journal article supplement (doi:10.1039/c8fo02315h), 2019-01-01
Supplement: c8fo02315h1.pdf [file c8fo02315h1.pdf]

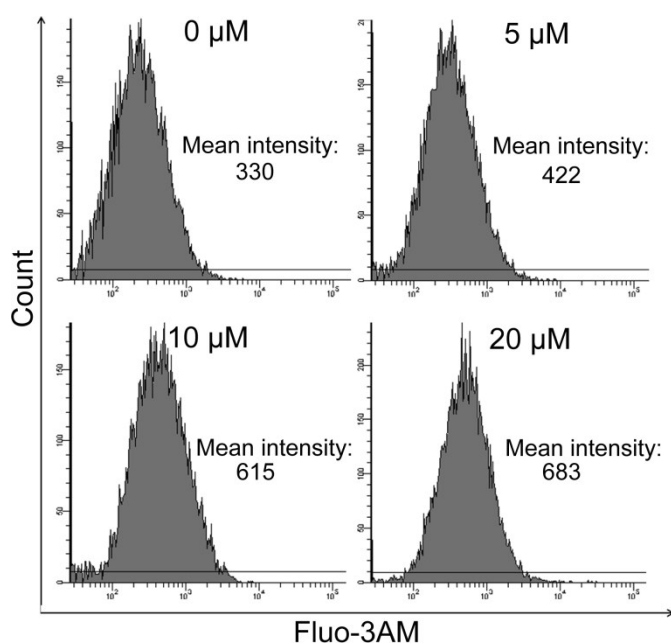

Fig. s1. HCT116 cells were treated with brosimone I at various concentrations for 24 h. Then the cytosolic  $\text{Ca}^{2+}$  was analyzed by Fluo-3AM staining using flow cytometry.

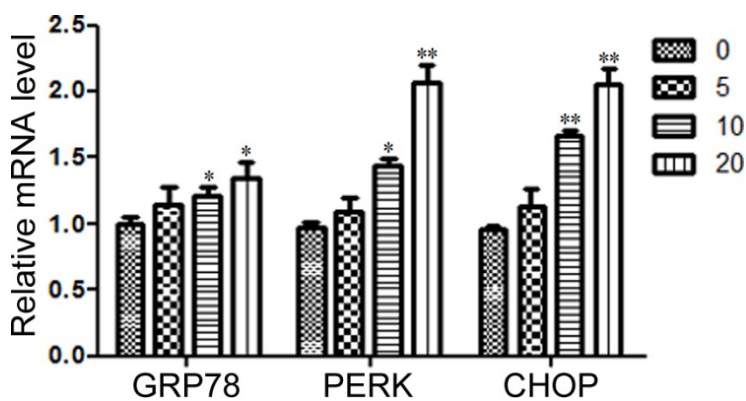

Fig. s2. HCT116 cells were treated with brosimone I at various concentrations for 24 h. The mRNA level of GRP78, PERK, CHOP, and GADPH was measured by qPCR analyses. Values are mean  $\pm$  standard deviation,  $n=3$ , \* $P < 0.05$ , \*\* $P < 0.01$ .

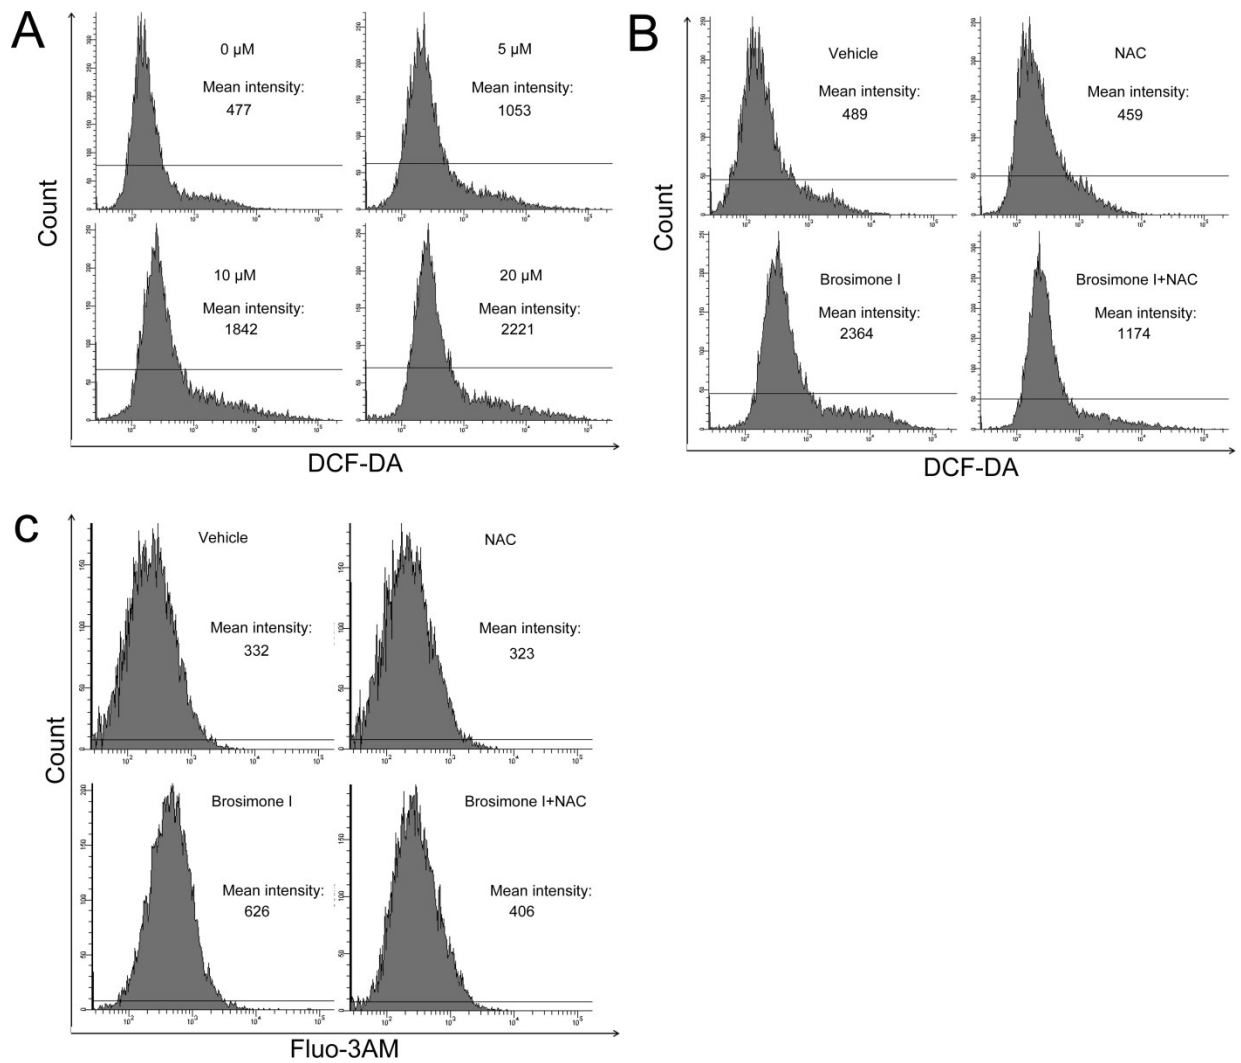

Fig. s3. (A) HCT116 cells were treated with brosimone I at various concentrations for 6 h, ROS levels were measured as DCF fluorescence intensity using flow cytometer. (B) HCT116 cells were preincubated with 10 mM of NAC for 1 h and then treated with brosimone I (15  $\mu\text{M}$ ) for 6 h. ROS levels were determined by flow cytometry. (C) the cytosolic  $\text{Ca}^{2+}$  was analyzed using flow cytometry.
